# Supplementary material for: Bedload Transport Monitoring in Alpine Rivers: Variability in Swiss Plate Geophone Response
Source: MDPI journal article supplement (doi:10.3390/s20154089), 2020-07-22
Supplement: s1 [file s1]

## supplementary material

# Bedload Transport Monitoring in Alpine Rivers: Variability in Swiss Plate Geophone Response

Gilles Antoniazza <sup>1,2,\*</sup>, Tobias Nicollier <sup>1</sup>, Carlos R. Wyss <sup>1</sup>, Stefan Boss <sup>1</sup> and Dieter Rickenmann <sup>1</sup>

<sup>1</sup> Swiss Federal Institute for Forest, Snow and Landscape Research (WSL), Mountain hydrology and mass movements, Zürcherstrasse 111, CH-8903 Birmensdorf, Switzerland; tobias.nicollier@wsl.ch (T.N.); carlos.wyss@wsl.ch (C.R.W.); stefan.boss@wsl.ch (S.B.); dieter.rickenmann@wsl.ch (D.R.)

<sup>2</sup> University of Lausanne (Switzerland), Institute of Earth Surface Dynamics (IDYST), Géopolis, CH-1015 Lausanne, Switzerland

\* Correspondence: gilles.antoniazza@unil.ch; Tel.: +41-21-692-4405 (CH)

Received: 9 June 2020; Accepted: 12 July 2020; Published: date

### Content of this file:

**Table S1:** regression coefficients between the kinetic energy  $E_k$  [J] of the impacts and the associated maximum amplitude  $A_{max}$  [V] recorded for each SPG at the laboratory experiment and the four investigated measuring stations.

**Text S and Figure S:** Maximum amplitude  $A_{max}$  [V] versus impulse count ( $> 0.1$  V)  $N_{imp}$  [-].

**Table S2:** regression coefficients between the impact maximum amplitude  $A_{max}$  [V] and the associated energy propagation at one and two plates of distance recorded for each SPG at the Avançon de Nant, the Albula and the Navisence measuring sites.

**Table S1.** Regression coefficients between the kinetic energy of the impacts  $E_k$  [J] and the associated maximum amplitude  $A_{max}$  [V] recorded for each SPG at the laboratory experiment and at the four investigated measuring stations. The line 'All' gives the regression coefficient for all the impacts on every sensors taken together at a given measuring station.

|                        | Intercept | Slope | R2    |
|------------------------|-----------|-------|-------|
| <b>Avançon de Nant</b> |           |       |       |
| Geo1                   | 10.312    | 1.198 | 0.986 |
| Geo2                   | 7.895     | 1.082 | 0.992 |
| Geo3                   | 9.910     | 1.121 | 0.994 |
| Geo4                   | 7.565     | 1.112 | 0.992 |
| Geo5                   | 7.820     | 1.074 | 0.992 |
| Geo6                   | 7.411     | 1.067 | 0.984 |
| Geo7                   | 7.052     | 1.149 | 0.985 |
| Geo8                   | 8.979     | 1.101 | 0.986 |
| Geo9                   | 6.823     | 1.088 | 0.990 |
| Geo10                  | 8.094     | 1.091 | 0.987 |
| All                    | 8.183     | 1.107 | 0.991 |
| <b>Albula</b>          |           |       |       |
| Geo2                   | 5.508     | 1.178 | 0.986 |
| Geo3                   | 6.844     | 1.145 | 0.987 |
| Geo4                   | 6.041     | 1.133 | 0.988 |
| Geo5                   | 3.878     | 1.166 | 0.972 |
| Geo6                   | 2.290     | 0.945 | 0.982 |
| Geo7                   | 1.271     | 0.881 | 0.989 |
| Geo8                   | 1.814     | 0.987 | 0.963 |
| Geo9                   | 2.439     | 1.052 | 0.965 |
| Geo10                  | 6.542     | 1.142 | 0.958 |
| Geo11                  | 5.047     | 1.159 | 0.989 |
| Geo12                  | 5.659     | 1.039 | 0.925 |
| Geo13                  | 4.913     | 1.009 | 0.953 |
| Geo14                  | 5.566     | 1.077 | 0.966 |
| Geo15                  | 4.944     | 1.070 | 0.948 |
| All                    | 4.528     | 1.077 | 0.988 |
| <b>Naviscence</b>      |           |       |       |
| Geo1                   | 5.643     | 1.050 | 0.976 |
| Geo2                   | 6.247     | 1.095 | 0.983 |
| Geo3                   | 4.676     | 1.064 | 0.992 |
| Geo4                   | 0.943     | 0.894 | 0.950 |
| Geo5                   | 1.821     | 1.027 | 0.941 |
| Geo6                   | 2.003     | 0.963 | 0.957 |
| Geo7                   | 5.900     | 1.115 | 0.985 |
| Geo8                   | 1.019     | 0.893 | 0.953 |
| Geo9                   | 2.690     | 0.989 | 0.969 |
| Geo10                  | 4.417     | 1.019 | 0.964 |
| Geo11                  | 4.067     | 0.954 | 0.973 |
| Geo12                  | 6.582     | 1.088 | 0.958 |
| All                    | 3.867     | 1.030 | 0.99  |
| <b>Riedbach</b>        |           |       |       |
| Geo1                   | 3.991     | 1.129 | 0.977 |
| Geo2                   | 3.733     | 1.120 | 0.970 |
| Geo3                   | 3.705     | 1.119 | 0.979 |

|                   |        |       |       |
|-------------------|--------|-------|-------|
| Geo4              | 4.394  | 1.190 | 0.972 |
| Geo5              | 4.700  | 1.171 | 0.968 |
| Geo6              | 3.615  | 1.116 | 0.985 |
| Geo7              | 3.491  | 1.192 | 0.975 |
| All               | 3.963  | 1.144 | 0.984 |
| <b>Laboratory</b> | 11.018 | 1.121 | 0.977 |

**Text S:** Maximum amplitude  $A_{\max}$  [V] versus impulse count ( $> 0.1$  V)  $N_{\text{imp}}$  [-].

The maximum amplitude  $A_{\max}$  and the impulse count  $N_{\text{imp}}$  are linked by a power law function with exponents close to 0.3 for the impact experiment developed in this paper, at all three measuring sites (Figure S1). The relations are not directly comparable to previously reported similar relations in the literature because of difference in the conditions of the experiment [1]. The above relationships are important to understand the link between  $A_{\max}$  and  $N_{\text{imp}}$ , notably the way the energy propagates across plates (Figure 10 in the main document). Results in Figure S2 show that the Avançon de Nant measuring station records about 30% more impulses for a given magnitude (energy) impact than the other two stations, potentially due to the lower rate of attenuation of the propagated energy across plates at this site, which leads to a greater number of impulses counted on non-impacted plates.

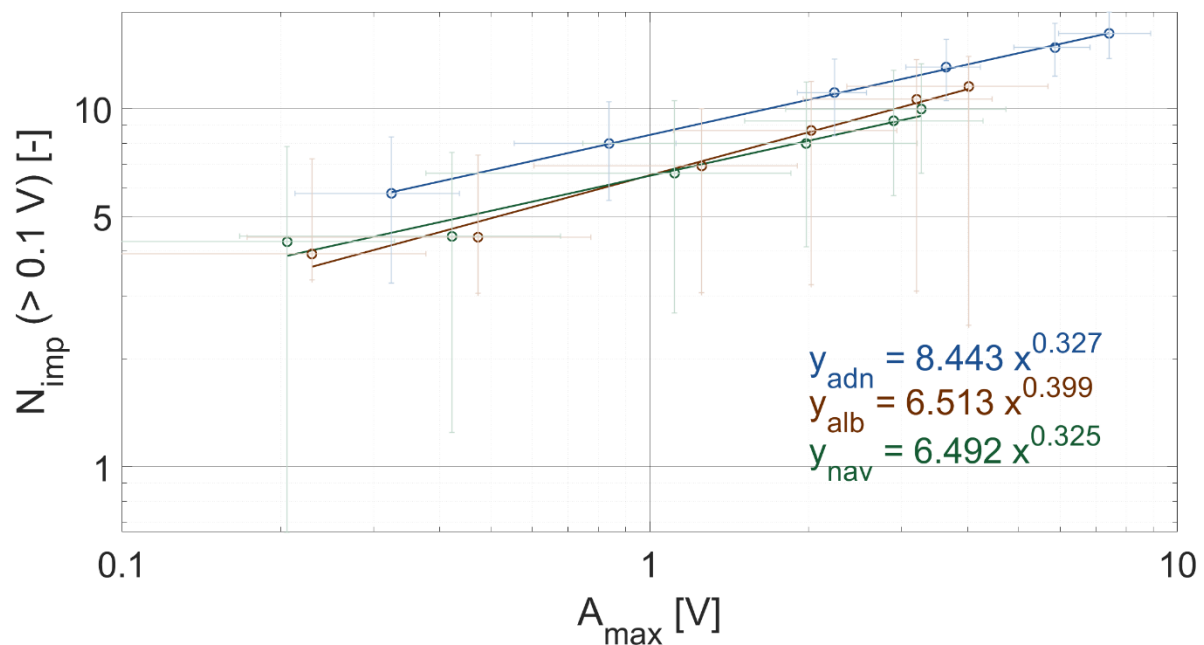

**Figure S.** relationship between  $A_{\max}$  and  $N_{\text{imp}}$  for the experiment developed in this paper at the Avançon de Nant, Albula and Naviscence measuring stations.

**Table S2.** regression coefficients between the impact maximum amplitude  $A_{\max}$  [V] and the associated energy propagation at one and two plates of distance recorded for each SPG at the Avançon de Nant, the Albula and the Naviscence measuring sites. The line ‘All’ gives the regression coefficients for all impacts on each plate taken together for a given measuring station, which are also reported in Table 7 in the main document.

|                            | 1 <sup>st</sup> plate |       |       | 2 <sup>nd</sup> plate |       |       |
|----------------------------|-----------------------|-------|-------|-----------------------|-------|-------|
|                            | Intercept             | Slope | R2    | Intercept             | Slope | R2    |
| <b>(a) Avançon de Nant</b> |                       |       |       |                       |       |       |
| Geo1                       | 0.175                 | 0.950 | 0.980 | 0.075                 | 0.905 | 0.985 |
| Geo2                       | 0.130                 | 0.863 | 0.987 | 0.073                 | 0.871 | 0.987 |
| Geo3                       | 0.149                 | 0.927 | 0.987 | 0.084                 | 0.888 | 0.977 |
| Geo4                       | 0.143                 | 0.924 | 0.980 | 0.074                 | 0.917 | 0.978 |
| Geo5                       | 0.192                 | 0.939 | 0.986 | 0.082                 | 0.876 | 0.987 |
| Geo6                       | 0.184                 | 0.914 | 0.987 | 0.082                 | 0.930 | 0.956 |
| Geo7                       | 0.139                 | 0.935 | 0.979 | 0.064                 | 0.929 | 0.979 |
| Geo8                       | 0.168                 | 0.941 | 0.985 | 0.083                 | 0.917 | 0.976 |
| Geo9                       | 0.143                 | 0.923 | 0.976 | 0.089                 | 0.859 | 0.989 |
| Geo10                      | 0.183                 | 0.935 | 0.979 | 0.081                 | 0.903 | 0.969 |
| All                        | 0.153                 | 0.919 | 0.978 | 0.079                 | 0.899 | 0.976 |
| <b>(b) Albula</b>          |                       |       |       |                       |       |       |
| Geo2                       |                       |       |       | 0.088                 | 0.856 | 0.984 |
| Geo3                       |                       |       |       | 0.094                 | 0.847 | 0.988 |
| Geo4                       |                       |       |       | 0.088                 | 0.795 | 0.978 |
| Geo5                       |                       |       |       | 0.095                 | 0.880 | 0.962 |
| Geo6                       |                       |       |       | 0.122                 | 0.843 | 0.985 |
| Geo7                       |                       |       |       | 0.156                 | 0.879 | 0.961 |
| Geo8                       |                       |       |       | 0.131                 | 0.871 | 0.926 |
| Geo9                       |                       |       |       | 0.101                 | 0.833 | 0.974 |
| Geo10                      |                       |       |       | 0.087                 | 0.826 | 0.978 |
| Geo11                      |                       |       |       | 0.075                 | 0.871 | 0.954 |
| Geo12                      |                       |       |       | 0.087                 | 0.874 | 0.982 |
| Geo13                      |                       |       |       | 0.094                 | 0.842 | 0.965 |
| Geo14                      |                       |       |       | 0.084                 | 0.832 | 0.972 |
| Geo15                      |                       |       |       | 0.076                 | 0.810 | 0.976 |
| All                        |                       |       |       | 0.094                 | 0.832 | 0.958 |
| <b>(c) Naviscence</b>      |                       |       |       |                       |       |       |
| Geo1                       | 0.096                 | 0.912 | 0.989 | 0.012                 | 0.786 | 0.973 |
| Geo2                       | 0.075                 | 0.863 | 0.972 | 0.014                 | 0.673 | 0.947 |
| Geo3                       | 0.082                 | 0.870 | 0.975 | 0.013                 | 0.742 | 0.948 |
| Geo4                       | 0.091                 | 0.950 | 0.936 | 0.015                 | 0.860 | 0.922 |
| Geo5                       | 0.078                 | 0.935 | 0.882 | 0.014                 | 0.636 | 0.979 |
| Geo6                       | 0.053                 | 0.858 | 0.901 | 0.016                 | 0.917 | 0.987 |
| Geo7                       | 0.088                 | 1.009 | 0.942 | 0.020                 | 0.792 | 0.968 |
| Geo8                       | 0.096                 | 0.930 | 0.957 | 0.011                 | 0.879 | 0.949 |
| Geo9                       | 0.110                 | 1.050 | 0.896 | 0.014                 | 0.930 | 0.905 |
| Geo10                      | 0.121                 | 0.786 | 0.938 | 0.014                 | 0.801 | 0.967 |
| Geo11                      | 0.092                 | 0.940 | 0.967 | 0.014                 | 0.661 | 0.961 |
| Geo12                      | 0.089                 | 0.942 | 0.909 | 0.013                 | 0.946 | 0.928 |
| All                        | 0.091                 | 0.919 | 0.932 | 0.014                 | 0.813 | 0.903 |

## References

1. Rickenmann, D., Turowski, J.M., Fritschi, B., Wyss, C., Laronne, J., Barzilai, R., Reid, I., Kreisler, A., Aigner, J., Seitz, H. Bedload transport measurements with impact plate geophones: comparison of sensor calibration in different gravel-bed streams. *Earth Surf. Process. Landforms* **2014**, *39*, 928–942.

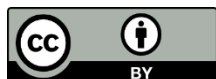

© 2020 by the authors. Submitted for possible open access publication under the terms and conditions of the Creative Commons Attribution (CC BY) license (<http://creativecommons.org/licenses/by/4.0/>).
